# Supplementary material
Source: PubMed Central journal article supplement (PMC10416089)
Supplement: NIHMS1903551-supplement-supp9.pdf [file NIHMS1903551-supplement-supp9.pdf]

**A) Antidepressant treatment outcome after 12 weeks (primary outcome measures)**

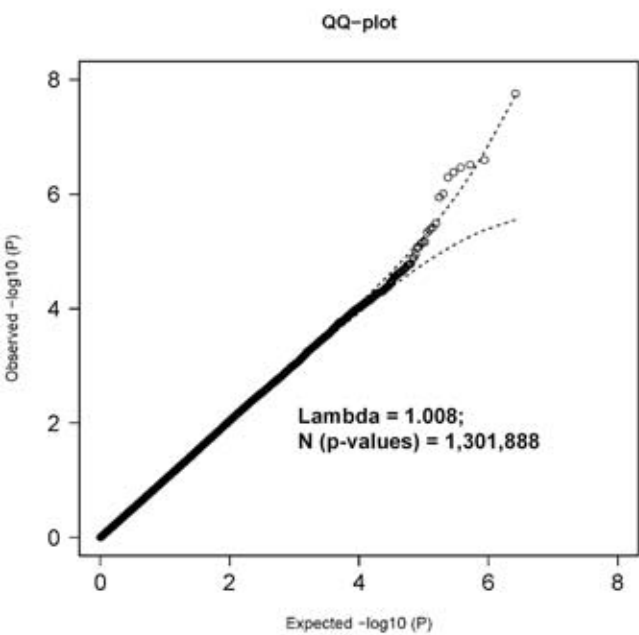

**Percent Change**

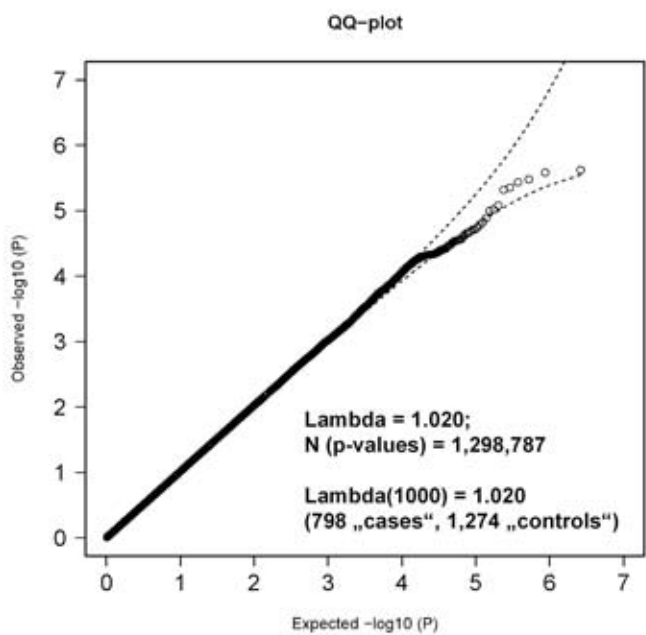

**Remission**

**B) Antidepressant treatment outcome after two weeks (secondary outcome measures)**

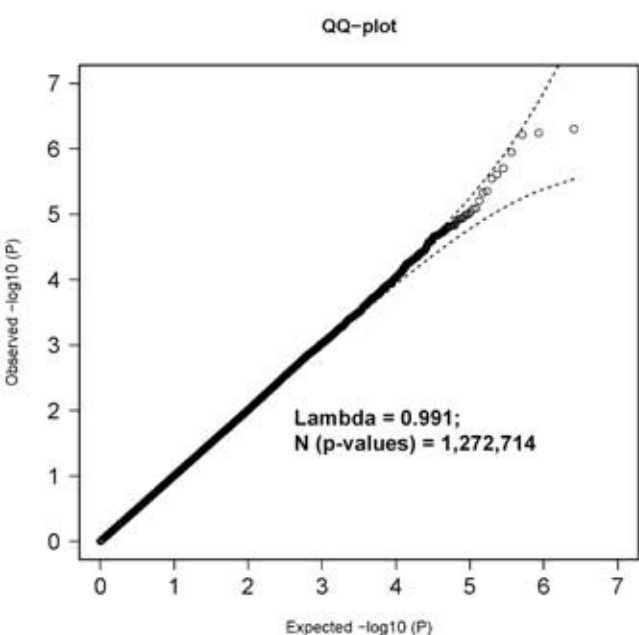

**Percent Change**

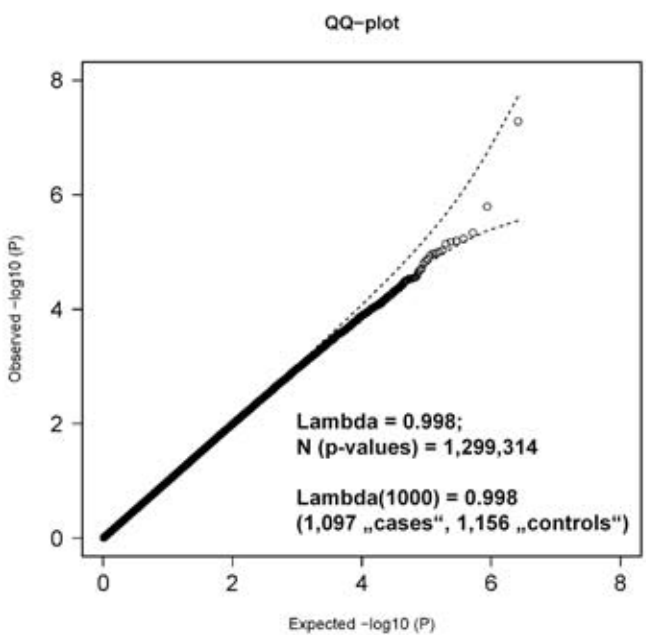

**Early Partial Response**

[Data Supplement for Uher et al. (doi: 10.1176/appi.ajp.2012.12020237) | Fig. S1]

**A) Antidepressant treatment outcome after 12 weeks in SSRI-treated subjects of GENDEP and STAR\*D (primary outcome measures)**

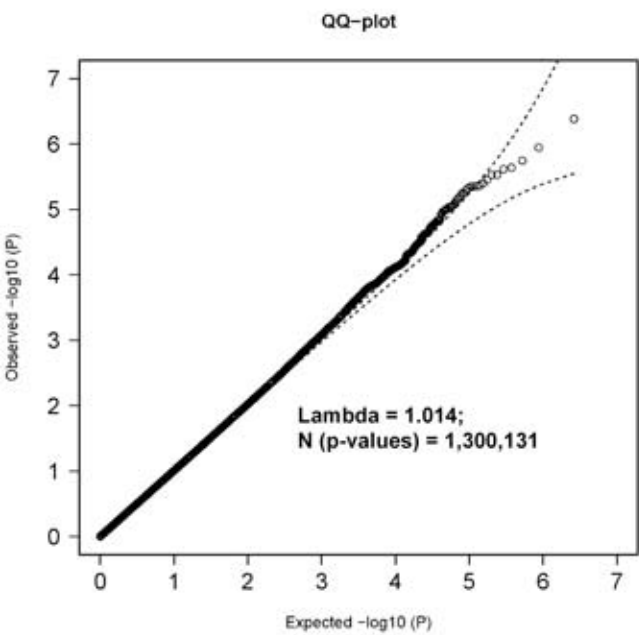

**Percent Change**

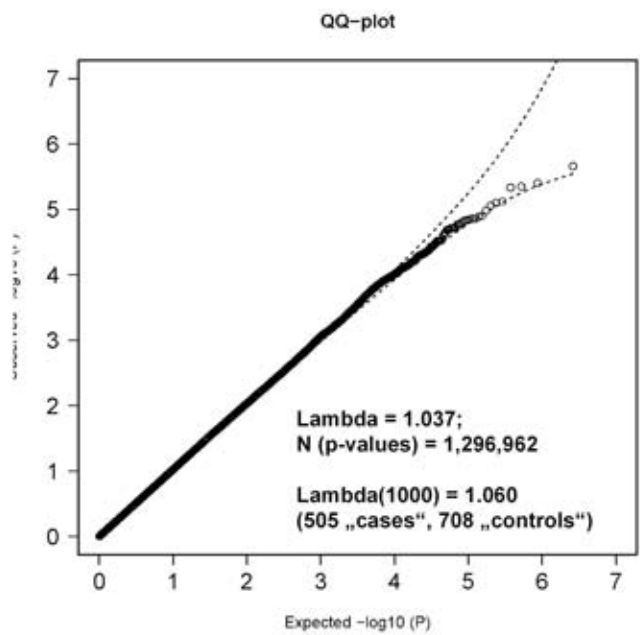

**Remission**

**B) Antidepressant treatment outcome after two week in SSRI-treated subjects of GENDEP and STAR\*D (secondary outcome measures)**

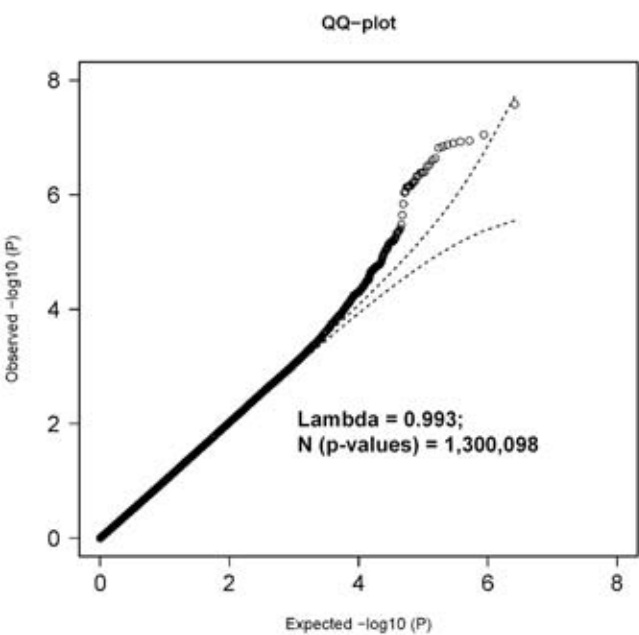

**Percent Change**

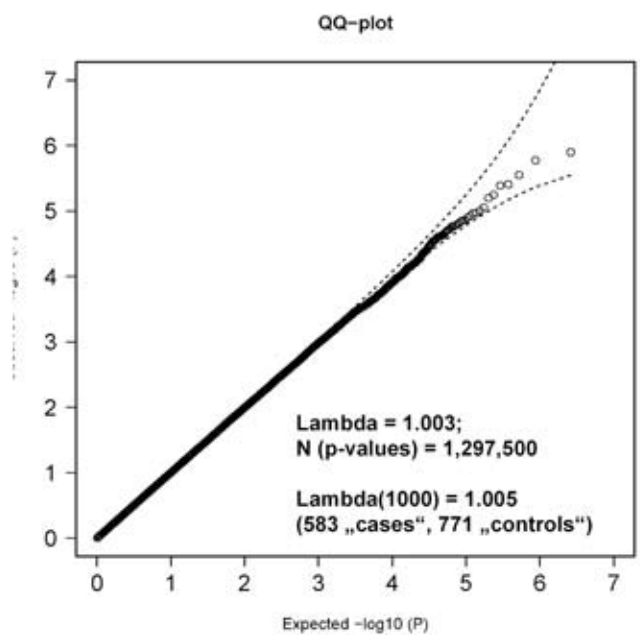

**Early Partial Response**

[Data Supplement for Uher et al. (doi: 10.1176/appi.ajp.2012.12020237) | Fig. S2]

**A) Percentage improvement after 12 weeks in SSRI-treated subjects of GENDEP and STAR\*D**

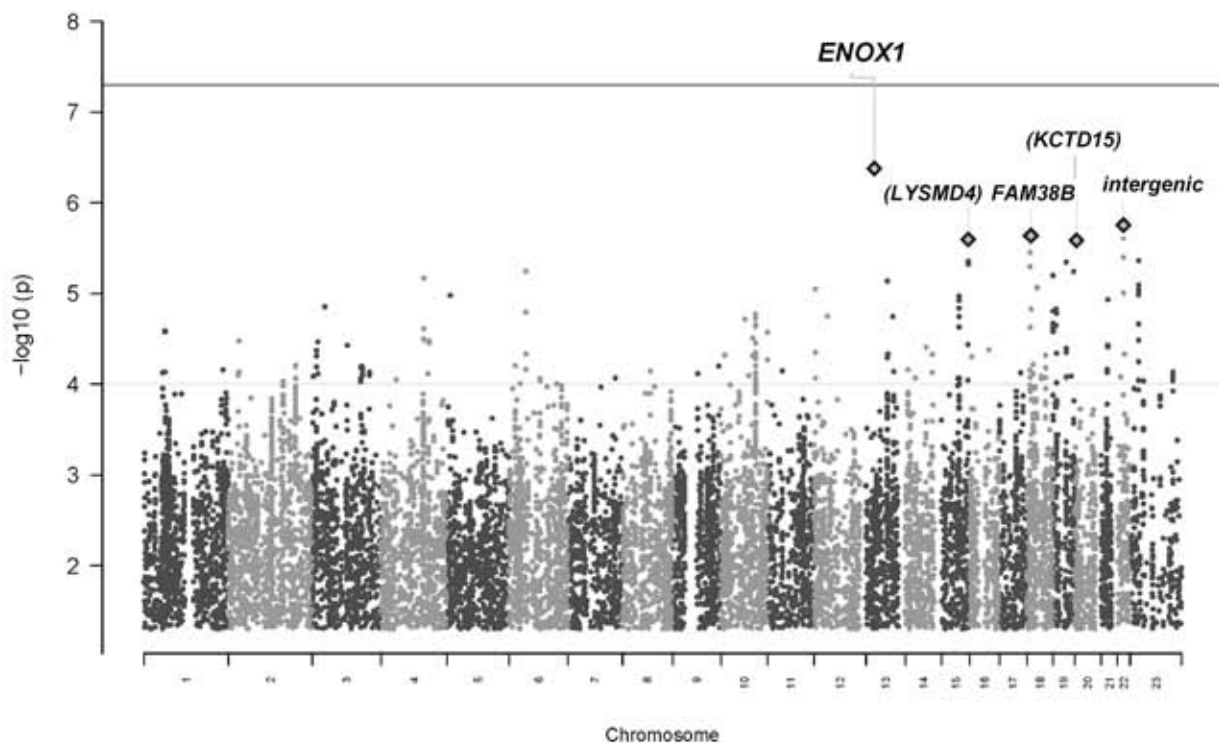

**B) Remission ( $HRSD-17 \leq 7$ ) after 12 weeks in SSRI-treated subjects of GENDEP and STAR\*D**

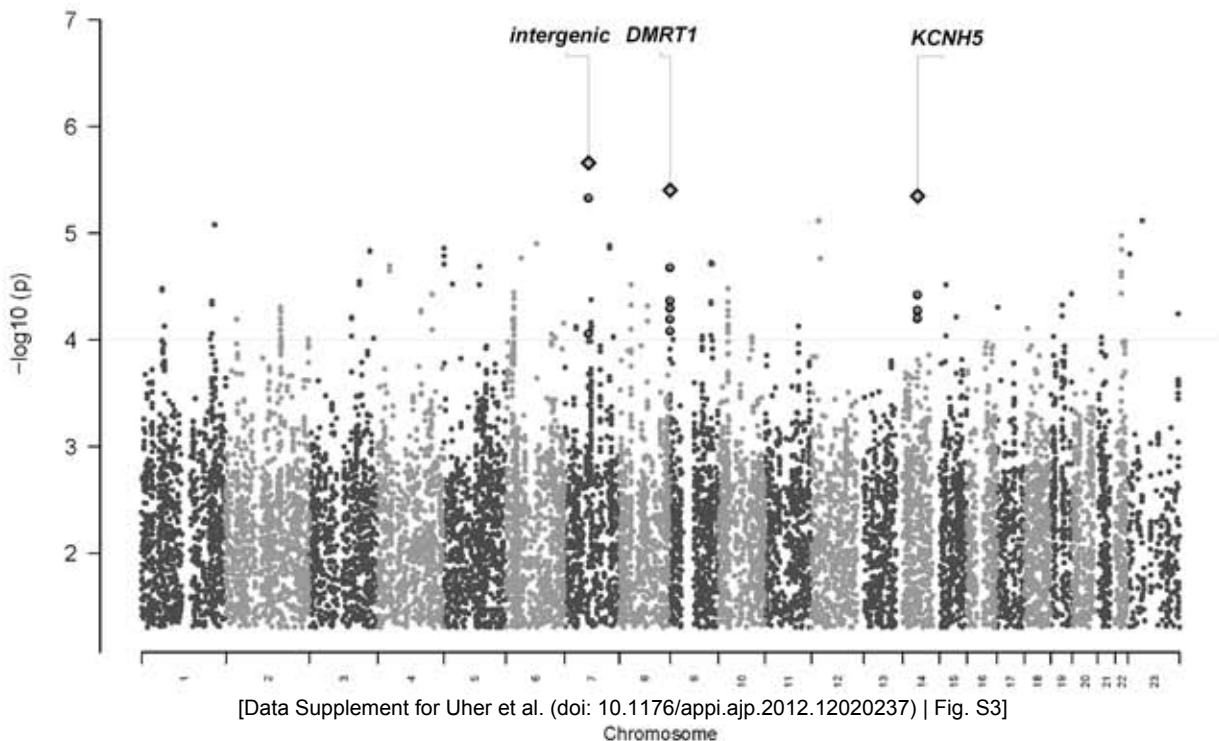

**A) Percentage improvement after 2 weeks in SSRI-treated subjects of GENDEP and STAR\*D**

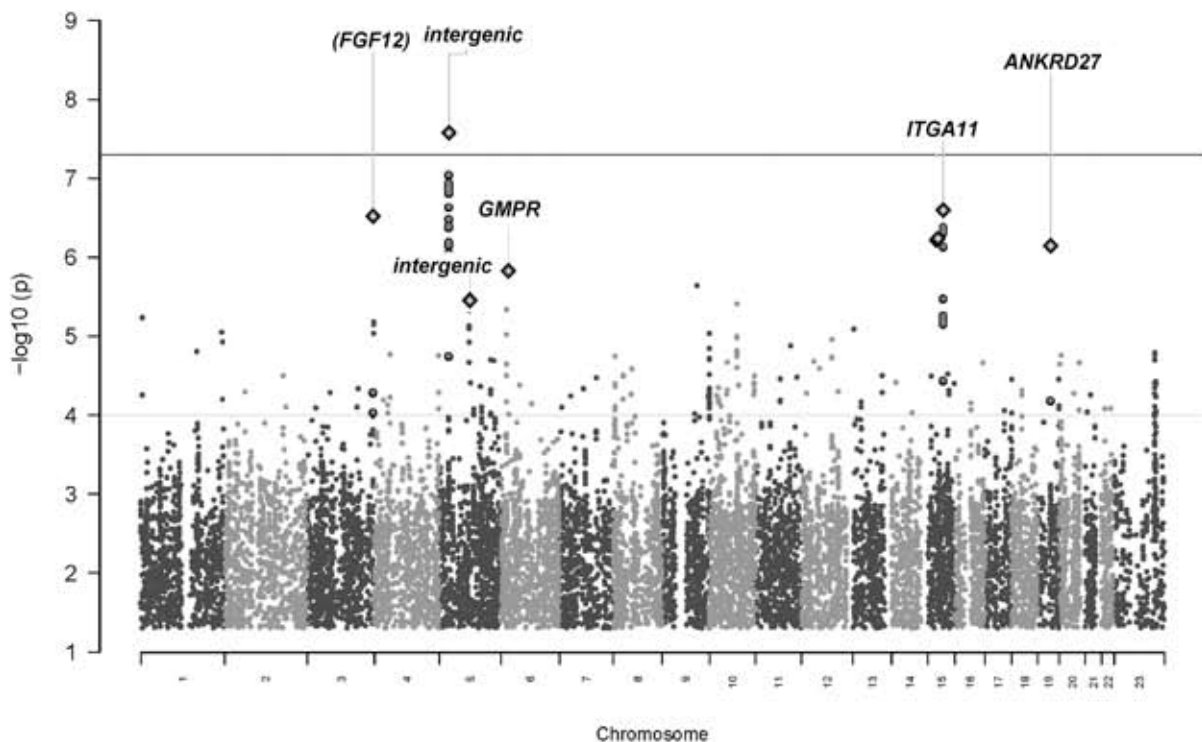

**B) Early partial response ( $\Delta\text{HRSD-17} \geq 25\%$ ) after 2 weeks in SSRI-treated subjects of GENDEP and STAR\*D**

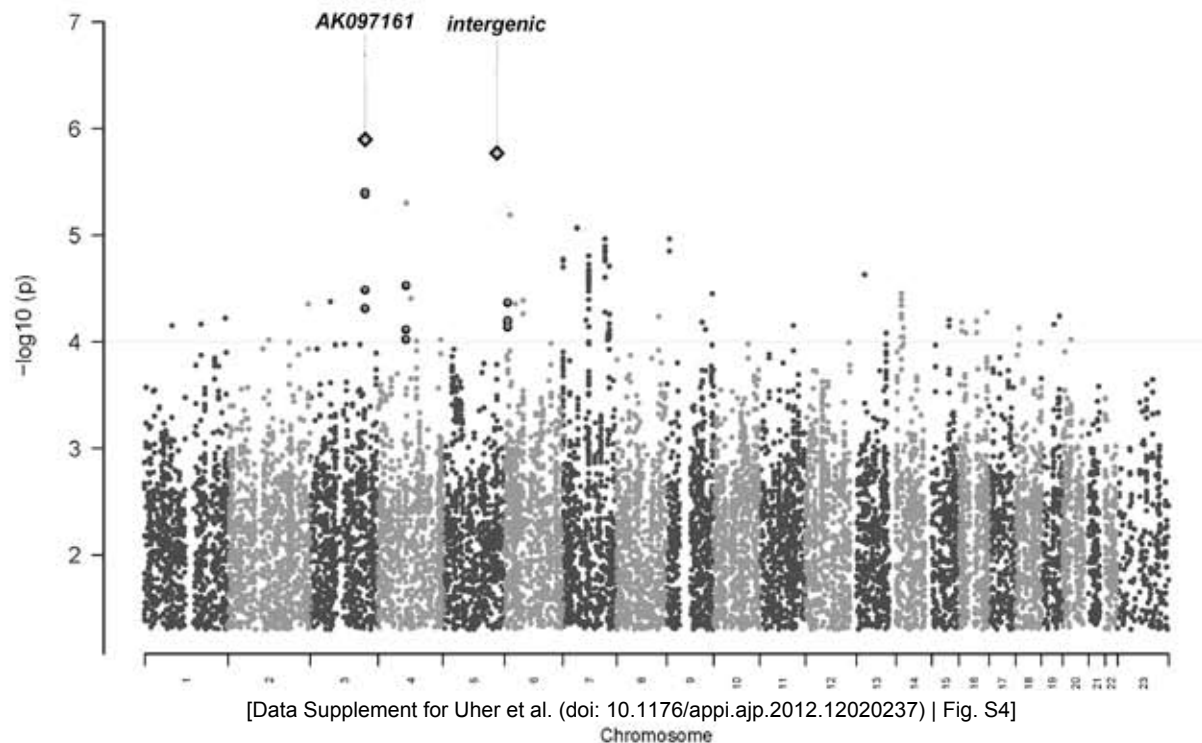

**Association pattern with percentage improvement after 2 weeks in SSRI-treated subjects in a 1000kb region around rs12054895 at 5p2.**

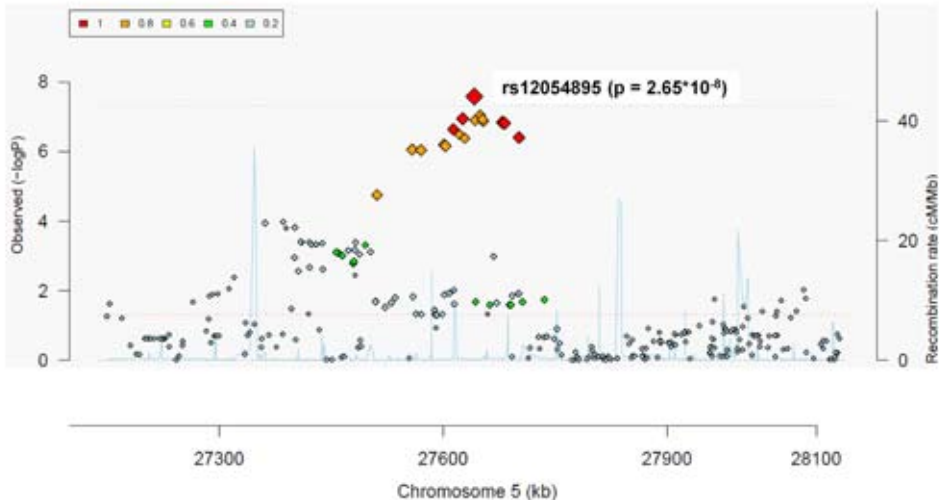

[Data Supplement for Uher et al. (doi: 10.1176/appi.ajp.2012.12020237) | Fig. S5]
